# Supplementary material
Source: PubMed Central journal article supplement (PMC4056848)
Supplement: ml200196p_si_001.pdf [file ml200196p_si_001.pdf]

**Table S1.** Data collection and refinement statistics for the human MAO B-inhibitor complexes

|                                | Rosiglitazone Complex                 | Pioglitazone Complex                  |
|--------------------------------|---------------------------------------|---------------------------------------|
| PDB Code                       | 4a7a                                  | 4a79                                  |
| Space group                    | C222                                  | C222                                  |
| Unit cell axes (Å)             | $a = 131.5, b = 223.2,$<br>$c = 86.5$ | $a = 131.9, b = 223.7,$<br>$c = 86.8$ |
| Resolution (Å)                 | 1.7                                   | 1.9                                   |
| $R_{\text{sym}}^{a,b}$ (%)     | 8.2 (42.1)                            | 8.2 (30.7)                            |
| Completeness <sup>b</sup> (%)  | 99.2 (98.7)                           | 100 (100)                             |
| Unique reflections             | 140,773                               | 102,915                               |
| Redundancy                     | 3.4 (3.3)                             | 4.2 (4.1)                             |
| $I/\sigma^b$                   | 10.5 (2.6)                            | 12.7 (4.6)                            |
| N° of atoms                    |                                       |                                       |
| protein/FAD/ligand/water       | 7914/2x53/2x19/791                    | 7914/2x53/2x25/695                    |
| Average B value for            |                                       |                                       |
| ligand atoms (Å <sup>2</sup> ) | 28.8                                  | 26.5                                  |
| $R_{\text{cryst}}^{b,c}$ (%)   | 18.6 (26.9)                           | 17.8 (21.8)                           |
| $R_{\text{free}}^{b,c}$ (%)    | 21.4 (30.8)                           | 20.8 (25.6)                           |
| Rms bond length (Å)            | 0.009                                 | 0.010                                 |
| Rms bond angles (°)            | 1.15                                  | 1.2                                   |

<sup>a</sup>  $R_{\text{sym}} = \sum |I_i - \langle I \rangle| / \sum I_i$ , where  $I_i$  is the intensity of  $i^{\text{th}}$  observation and  $\langle I \rangle$  is the mean intensity of the reflection.

<sup>b</sup> Values in parentheses are for reflections in the highest resolution shell.

<sup>c</sup>  $R_{\text{cryst}} = \sum |F_{\text{obs}} - F_{\text{calc}}| / \sum |F_{\text{obs}}|$  where  $F_{\text{obs}}$  and  $F_{\text{calc}}$  are the observed and calculated structure factor amplitudes, respectively.

$R_{\text{cryst}}$  and  $R_{\text{free}}$  were calculated using the working and test sets, respectively.
